# Supplementary material for: Identification of the Carbohydrate and Organic Acid Metabolism Genes Responsible for Brix in Tomato Fruit by Transcriptome and Metabolome Analysis
Source: Front Genet. 2021 Sep 3;12:714942. doi: 10.3389/fgene.2021.714942 (PMC8446636; doi:10.3389/fgene.2021.714942)
Supplement: Supplementary Data Sheet 1 — The contents of organic acids and carbohydrates in fruit samples at three stages. [file Data_Sheet_1.XLS]

## Sheet: Sheet 1
	Organic acid									Carbohydrate
	Pre-Processing		The content in the extract (ug/mL)		The content in the original sample (ug/g)		The average content in the original sample (ug/g)		Total organic acid content (ug/g)	Pre-Processing			The content in the extract (ug/mL)			The content in the original sample (ug/g)			The content in the original sample (ug/g)		Total sugar content (ug/g)	Sugar/organic acid ratio
Sample names	Sample quantity (g)	10% methanol extract (mL)	L-Malic acid	Citric acid	L-Malic acid	Citric acid	L-Malic acid	Citric acid		Sample quantity (g)	10% methanol extract (mL)	Dilution ratio	D-Fructose	D-Glucose	D-Sucrose	D-Fructose	D-Glucose	D-Sucrose	D-Fructose	D-Glucose
TM-1-S1	0.3854	1.5	611.92	2529.53	2381.63	9845.08	2648.51	9836.61	12485.1	0.2773	2	2	244.42	126.66	<1	3525.71	1827.05	<20	3374.43	1626.69	5001.12	0.400567
	0.3599	1.5	758	2141.39	3159.21	8924.94				0.2526	2	2	202.69	90.09		3209.66	1426.6
	0.4425	1.5	709.38	3168.24	2404.68	10739.8				0.265	2	2	224.45	107.75		3387.92	1626.42
TM-1-S2	0.6259	1.5	613.81	3773.05	1471.03	9042.3	1405.84	9642.98	11048.8	0.2423	2	2	431.66	205.78		7126.04	3397.11		9591.87	4716.48	14308.4	1.29501
	0.6532	1.5	618.87	4172.16	1421.17	9580.89				0.1951	2	2	489.45	239.67		10034.9	4913.79
	0.5686	1.5	502.39	3906.57	1325.33	10305.8				0.2636	2	2	765.41	384.76		11614.7	5838.54
TM-1-S3	0.4196	1.5	273.87	2587.84	979.04	9251.1	959.754	8045.66	9005.42	0.399	2	2	1009.38	454.9		10119.1	4560.4		15548.4	6905.57	22453.9	2.49338
	0.498	1.5	301.31	2403.71	907.56	7240.09				0.3802	2	2	2106.04	879.51		22157.2	9253.13
	0.4926	1.5	325.99	2510.88	992.661	7645.8				0.3454	2	2	1240.75	596.09		14368.8	6903.18
TM-38-S1	0.4946	1.5	410.32	320.26	1244.4	971.27	1218.4	1307.78	2526.18	0.4304	2	2	1504.39	835.97		13981.3	7769.24		15343.3	7961.51	23304.8	9.22529
	0.3854	1.5	355.35	479.43	1383.04	1865.97				0.4215	2	2	1746.49	906.69		16574	8604.41
	0.3224	1.5	220.9	233.44	1027.76	1086.1				0.4326	2	2	1673.56	812.3		15474.4	7510.86
TM-38-S2	0.5327	1.5	342.93	1544.83	965.637	4350	896.539	3243.5	4140.03	0.5389	2	2	2152.07	972.85		15973.8	7221.01		16467.5	7130.72	23598.2	5.69999
	0.5689	1.5	340.84	1195.7	898.682	3152.66				0.5234	2	2	2120.44	994.91		16205.1	7603.44
	0.602	1.5	331.22	894.1	825.299	2227.82				0.5252	2	2	2261.44	862.34		17223.5	6567.71
TM-38-S3	0.5198	1.5	182.92	1480.87	527.857	4273.38	520.954	2908.8	3429.75	0.4495	2	2	1760.23	762.32		15663.9	6783.72		15538.9	6575.04	22113.9	6.44767
	0.587	1.5	202.88	1031.91	518.433	2636.91				0.4963	2	2	1677.98	737.72		13523.9	5945.76
	0.5802	1.5	199.81	702.47	516.572	1816.11				0.4044	2	2	1762.05	707.26		17428.8	6995.65

## Sheet: legend
The contents of organic acids and carbohydrates in fruit samples at three stages
